## 1 **Discrete and Continuous Cell Identities of the Adult Murine Striatum**

2  
3 Geoffrey Stanley<sup>1,\*</sup>, Ozgun Gokce<sup>2,\*</sup>, Robert C. Malenka<sup>3</sup>, Thomas C. Südhof<sup>2,4,†</sup>, Stephen R.  
4 Quake<sup>5,6,7,†</sup>

5 <sup>1</sup>Program in Biophysics, <sup>2</sup>Department of Molecular and Cellular Physiology, <sup>3</sup>Nancy Pritzker  
6 Laboratory, Department of Psychiatry and Behavioral Sciences, and <sup>4</sup>Howard Hughes Medical  
7 Institute, Stanford University School of Medicine, Stanford, CA 94305.

8 <sup>5</sup>Department of Bioengineering and <sup>6</sup>Department of Applied Physics, Stanford University,  
9 Stanford, CA 94305.

10 <sup>7</sup>Chan Zuckerberg Biohub, San Francisco, CA 94158.

11 \*These authors contributed equally to this work.

12 †correspondence: Thomas C. Südhof, [tcsl@stanford.edu](mailto:tcsl@stanford.edu). Stephen R. Quake  
13 [steve@czbiohub.org](mailto:steve@czbiohub.org)  
14

### 15 **Abstract** (251 words)

16  
17 The striatum is a large brain region containing two major cell types: D1 (dopamine receptor 1) and D2  
18 (dopamine receptor 2) expressing spiny projection neurons (SPNs). We generated a cell type atlas of the  
19 adult murine striatum using single-cell RNA-seq of SPNs combined with quantitative RNA *in situ*  
20 hybridization (ISH). We developed a novel computational pipeline that distinguishes discrete versus  
21 continuous cell identities in scRNA-seq data, and used it to show that SPNs in the striatum can be  
22 classified into four discrete types that reside in discrete anatomical clusters or are spatially intermingled.  
23 Within each discrete type, we find multiple independent axes of continuous cell identity that map to  
24 spatial gradients and whose genes are conserved between discrete types. These gradients correlate well to  
25 previously-mapped gradients of connectivity. Using these insights, we discovered multiple novel spatially  
26 localized region of the striatum, one of which contains patch-D2 SPNs that express *Tac1*, *Htr7*, and *Th*.  
27 Intriguingly, we found one subtype that strongly co-expresses both D1 and D2 dopamine receptors, and  
28 uniquely expresses a rare D2 receptor splice variant. These results collectively suggest an organizational  
29 principal of neuron identity in which major neuron types can be separated into discrete classes with little  
30 overlap and no implied spatial relationship. However these discrete classes are then continuously  
31 subdivided by multiple spatial gradients of expression defining anatomical location via a combinatorial  
32 mechanism. Finally, they suggest that neuronal circuitry has a substructure at far higher resolution than is  
33 typically interrogated which is defined by the precise identity and location of a neuron.  
34

### 35 **Introduction**

36  
37 Neuronal computation is typically thought of as the interactions of defined circuits between large groups  
38 of cells called neuron types, which are interrogated by using marker genes that are expressed only in a  
39 given type in a brain region. Single-cell transcriptomics has advanced these efforts by enabling the  
40 identification of markers for hundreds of candidate neuron types across many brain regions<sup>1-10</sup>. Broad  
41 neuron classes generally form clear, non-overlapping clusters, often distinguishable by a single marker  
42 gene<sup>1,11,12</sup>. Within those classes, however, neuron types often overlap or form gradients<sup>1,11,12</sup> suggesting  
43 the existence of a further layer of identity structure within each discrete type<sup>14</sup>. It is not clear how best to  
44 analyze single cell data to reveal these differences, or whether this continuous heterogeneity can even be  
45 used to classify neurons<sup>13,14</sup>. These controversies are partly due to the possibility that continuous  
46 heterogeneities represent transient cell states or genetic differences between animals<sup>13</sup>. More generally,

47 this phenomenon calls into question the paradigms of assigning cell types into discrete identities and  
48 defining neuronal circuits by large, homogeneous groups of cells.

49  
50 We created a single-cell sequencing dataset of a brain region paired with an *in situ* analysis of every  
51 subtype that provides a ground-truth reference for which neuronal identities are discrete and which are  
52 varying continuously. To analyze this data we developed a novel algorithm that distinguishes between  
53 continuous and discrete variation. We used this algorithm to show that striatal heterogeneity is comprised  
54 of four discrete subtypes of SPNs; three of these discrete subtypes vary continuously along multiple  
55 shared axes of gene expression, and these shared continuous axes encode for spatial location. We also  
56 find spatial compartments that are limited to a single discrete type, and we discovered a novel region of  
57 the striatum, which we call the ventromedial patch and is composed of D2 SPNs that co-express *Tac1*,  
58 *Penk*, *Htr7*, and *Th*. We used full-length cDNA to show that a subtype, which we previously referred to as  
59 D1-*Pcdh8*, co-expresses *Drd1a* and the rare “short” isoform of the D2 receptor<sup>12</sup>. Due to this hybrid-like  
60 expression, we name it the D1H SPN.

61  
62 Our results reveal an important organizing principle of neuronal identity and circuits. Continuous  
63 variation of identity has been observed previously to relate to spatial location in simple systems  
64 comprised of single cell types or single spatial axes<sup>15–18</sup>. Here we show that cell types are subdivided by  
65 multiple, independent spatial gradients of expression. We further show that the genes underlying these  
66 spatial axes can be conserved between discrete subtypes, allowing for the inference of spatial position of  
67 multiple cell types in complex tissues from a small number of reference markers. This also provides a  
68 fundamental explanation for why combinations of genes often are required to specify neuronal cell types:  
69 a cell is best described by the combination of its discrete identity and its position along each independent  
70 spatial axis. This discovery has obvious implications for the choice of strategy to establish comprehensive  
71 cell atlases of model organisms.

72  
73 More broadly, our results have implications for neuronal circuits and computation. We find that neurons  
74 of the same type have highly localized gene expression patterns due to multiple spatial gradients of gene  
75 expression. We find that previously mapped connectivity correlates well to these gene expression patterns,  
76 suggesting that neuronal circuits can be subdivided into very small units depending on gene expression.  
77 This contrasts with existing models of neuronal circuits, which are traditionally defined by large groups of  
78 cells with shared regulatory regions from single marker genes. Our results suggest that developing  
79 combinatorial, spatially-precise approaches to targeting neurons may substantially improve our  
80 understanding of neuronal computation.

## 81 **Results**

82 We previously found that most cells clearly classified as D1 or D2 SPNs<sup>12</sup>. However, we also reported  
83 several novel subtypes that co-expressed *Tac1* and *Penk* (D1-*Pcdh8*, D2-*Htr7*) as well as continuous  
84 gradients of expression within the major D1 and D2 subtypes. Importantly, we observed that some of  
85 subtypes seemed more discrete and defined by binary on/off patterns of gene expression, and other  
86 heterogeneity was more continuous and defined by gradients of gene expression. However, we were  
87 limited in our ability to clearly distinguish these distributions and determine the exact number of  
88 intermediates by our limited number of cells. We therefore prepared 1343 single dissociated D1-tdTom+  
89 or D2-GFP+ SPNs from 5 adult mouse brains using Smart-Seq2 full-length amplification, and analyzed  
90 1211 cells with at least 1e5 mapped reads and 1000 detected genes (Sup Fig 1A,B).

91  
92  
93 *Improved detection of discrete SPN types*

94 We applied a standard clustering pipeline, PCA of the top variable genes followed by tSNE projection  
95 and Louvain clustering on a shared-nearest-neighbor (SNN) graph. This pipeline produced two apparently  
96 discrete clusters on a tSNE mapping. We first assessed the continuity of the clusters using partial

97 approximate graph abstraction (PAGA)<sup>19</sup>. We initially found that none of the clusters separated into  
98 discrete types (Fig 1A-i). However, the gene expression underlying the D1/D2 difference appeared to  
99 change sharply (Fig 1B, Sup Fig 1E). Previously, we showed that the gene expression distribution  
100 underlying the D1/D2 separation was strongly bimodal and nearly all cells could be classified as either D1  
101 or D2<sup>12</sup>. Additionally, we showed that we could considerably decrease the amount of technical variability  
102 in a PCA dimensionality reduction by truncating the PC loadings so that only the top PC-associated genes  
103 contributed to PCA (truncated PCA)<sup>20</sup>. We applied this modification to PCA and PAGA, and this resulted  
104 in a clear, discrete separation between D1 and D2 SPNs (Fig 1A-ii). We found evidence that this  
105 adjustment reduced the average contribution of batch (sequencing plate) variability to PCs (Sup Fig 1L),  
106 possibly because batch effects are caused by small changes consistent across thousands of genes. We also  
107 removed PCs that likely did not represent stable cell identity, like immediate early gene expression or  
108 batch effect (Sup Fig F-I). After this computational optimization, we identified 4 discrete clusters: D1  
109 SPN, D2 SPN, a subtype expressing *Drd1a* and *Rreb1* that we identified as SPNs located in the islands of  
110 Calleja (ICj), and a subtype expressing *Nxph4* and *Pcdh8* that we had previously reported (D1-Pcdh8)  
111 (Fig 1B). We then re-applied dimensionality reduction and clustering to each of the 4 discrete subtypes.  
112 We found that truncated PCA-based clustering did not reveal any further discrete subtypes; however,  
113 truncated PCA of D2 subtypes considerably reduced batch effect (Sup Fig 1J). We compared cluster  
114 marker genes to a publicly-available RNA ISH database<sup>40</sup> to map the heterogeneity within D1 and D2  
115 SPNs to anatomical regions of the striatum (Fig 1C-F, Sup Fig 2A-E). Within D1 SPNs, we found 8  
116 subgroups of cells, and within D2 SPNs, we found 7 subpopulations, nearly all of which corresponded to  
117 anatomical regions of the striatum (Fig 1C, D). We found a small number of cells expressing *Serpinb2* in  
118 D1 SPNs, which the *in situ* database showed to be highly specific to a novel sub-region of the medial  
119 shell (Fig 1C-G), Sup Fig 2A,E).

#### 121 *Mapping the discrete cell types of the striatum.*

122 We then sought to map the discrete cell types of the striatum and understand whether their *in situ*  
123 distributions were also discrete. We quantified the discrete identity of SPNs by RNAscope *in situ*  
124 hybridization of their markers. We first stained and quantified D1 vs. D2 identity by the log ratio of *Tac1*  
125 to *Penk* expression (Fig 2A). As expected, D1 and D2 cells were spatially intermingled throughout most  
126 of the striatum (Fig 2B). We found that this identity was very strongly bimodal with few intermediates,  
127 corresponding to the discrete nature of D1 vs. D2 identity (with a small number of co-expressing cells that  
128 correspond to other subtypes) (Fig 2C).

129  
130 We then analyzed the spatial distribution of the small discrete populations in our analysis. Our  
131 computational analysis predicted that the islands of Calleja (ICj) SPN subtype was discretely separated  
132 from the rest of the SPN types (Fig 1A-ii). Interestingly, this subtype is not present in previously  
133 published single-cell atlases of the nervous system. We quantified the identity of the ICj subtype as  
134 *Synpr* – (*Cxcl14* + *Nts*) in log intensity space (Fig 2E). We found that expression of this identity  
135 changed in a discrete step along a spatial axis from the olfactory tubercle to the ICj (Fig 2F, G). This  
136 matches with previous anatomical observations that the islands of Calleja appeared distinct from the rest  
137 of the striatum, supporting the validity of our scRNAseq and *in situ* analyses<sup>21</sup>.

138  
139 Finally, we stained for the *Tac1*/*Penk*-co-expressing D1H subtype, which is comprised of two continuous  
140 subtypes (*Nxph4*+ or *Tac2*+). D1H-*Nxph4* cells were intermingled with classical D1 and D2 cells in the  
141 dorsal striatum and clustered in ventrolateral structures (Fig 2I-K). We quantified D1H identity *in situ* as  
142 *Nxph4* + *Tac1* + *Penk* in log-intensity space and found a discrete step change in D1H identity from the  
143 ventral striatum to the D1H cluster (Fig. 2L). We performed a similar analysis for the *Tac2*+ D1H subtype,  
144 and saw it exclusively in discrete ventromedial clusters (Fig 2N-P). The D1H subtype had been  
145 previously mapped *in situ* but the discrete ventral clusters were not reported, likely due to the gene *Otof*  
146 not being a unique marker for D1H cells in the ventral striatum (Sup Fig 3C)<sup>10</sup>. Generally, we find that

147 discrete gene expression patterns are associated with intermingled (D1, D2, D1H) or discretely-clustered  
148 (D1H, D1-ICj) neuronal types.

149

#### 150 *Gene expression gradients underlie continuous subtypes of the striatum*

151 We applied PC truncation, filtering, and PAGA to D1 and D2 SPNs to reveal the continuous axes of  
152 heterogeneity (Fig 3A, B). Generally, we found that continuous subtypes were spatially-adjacent. For  
153 example, the subtype mapping to the medial shell was continuous only with the NAcc subtype and not the  
154 CPu, which corresponds to the fact that the medial shell is physically adjacent only to the NAcc (Fig 3C,  
155 D). This led us to believe that the gene expression distributions underlying continuous subtypes  
156 represented gradients of expression. We found a signature of genes correlated to *Cnr1* and *Crym* shared  
157 between 3 discrete subtypes in the scRNAseq data (Fig 3E). *In situ* staining of *Cnr1* and *Crym* revealed a  
158 gradient consisting of a 250-fold change in relative expression along the full 2mm-long dorsolateral-  
159 ventromedial axis (Fig 3F). Individual cells in between the dorsolateral-ventromedial poles had clearly  
160 intermediate expression levels of both *Cnr1* and *Crym* (Fig 3G, H). We describe the first single-cell *in*  
161 *situ* proof that these genes change along a dorsolateral-ventromedial gradient at a single-cell level and are  
162 not the result of heterogenous distributions of discrete cell types. Similarly, we found that the medial shell  
163 gene program was a gradient from the NAcc to the dorsal tip of the medial shell (Fig 1F, Fig 3C, Sup Fig  
164 3D,E). The medial-shell subtype is not apparent in previous droplet-microfluidics single-cell atlases of the  
165 striatum, possibly due to dissociation bias.

166

167 We then found that genes correlated to the patch-matrix markers *Kremen1* and *Id4* formed a gradient in  
168 both D1 and D2 cells that was largely orthogonal to the *Cnr1-Crym* gradient (Fig 1D, Fig 3I). We stained  
169 for the patch-matrix organization using probes to *Kremen1*, *Sema5b* (which was highly correlated to  
170 *Kremen1*), and *Id4* (Fig 3I). We quantified patch-matrix identity as  $Kremen1 + Sema5b - Id4$  in log-  
171 intensity space. The patches appeared to lack discrete boundaries, but the 2D spatial arrangement was too  
172 complex to easily map to a single spatial axis (Fig 3J, K). Therefore, to determine whether the patch-  
173 matrix organization was discrete or not, we manually identified boundaries of the patches and performed  
174 a Monte Carlo simulation of discrete patches (Fig 3K). We quantified the degree of spatial organization as  
175 the correlation between a cell and its second-nearest-neighbor ( $\rho_{2nn}$ ) (Fig 3L). We found that the patch-  
176 matrix was much more spatially organized than a discrete-patch model would predict ( $p < 0.001$ ) (Fig  
177 3L, M). This indicated that patch-matrix identity is not binary and instead depends continuously on  
178 distance from the center of a patch. We thus present the first proof that the patch-matrix distribution is a  
179 continuous spatial relationship at the single cell level.

180

181 We also observed continuous subtypes that predicted anatomical location over very small length scales.  
182 One of the D1-only continuous subtypes localized to the “ruffles”, small protrusions of the olfactory  
183 tubercle. In the scRNA-seq data, a small subgroup of cells expressing *Nts* was most directly continuous  
184 with the D1 population expressing *Cxcl14*, a marker enriched in the OT ruffles (Fig 1D, Fig 3N). To  
185 determine if these were gradients, we stained for *Cxcl14*, *Nts*, and *Synpr* (a gene de-enriched in the OT)  
186 (Fig 3O, P). We found that *in situ* expression levels of these genes changed continuously from the ventral  
187 NAcc to the OT (Sup Fig 3F, G). Their expression again changed continuously along a spatial axis from  
188 the flat OT to the OT ruffles over just 150  $\mu\text{m}$  (Fig 3G, H). This demonstrates that continuous  
189 relationships in scRNAseq data predict anatomical position even over very small length scales. We also  
190 identified a novel expression gradient within the OT-ruffles where *Tnnt1* increased with proximity to the  
191 pial surface only in the lateral OT-ruffles (Fig 1D). Previous single-cell atlases of the brain did not  
192 analyze the ventrolateral and OT regions of the striatum<sup>10</sup> and therefore omitted these subtypes.

193

194

195 *A novel spatial compartment of the striatum: D2H ventromedial “patches”*

196 As reported previously, a subtype of D2 SPNs (D2-*Htr7* or D2H) co-expresses *Penk* and *Tac1*<sup>10,12</sup>. Unlike  
197 the D1H population, this population exclusively expresses *Drd2* and not *Drd1a*. Our scRNAseq analysis  
198 predicts that it is continuous with the D2-patch cells, but not the D2-matrix cells (Fig 4A). This is  
199 supported by the fact that there is strong overlap between marker genes defining the D2-patch and D2H  
200 cell types (Fig 4A). Since the D2-patch cells have a distinct spatial distribution, and we have shown that  
201 continuous subtypes are always anatomically related, we hypothesized that the spatial distribution of the  
202 D2H cells would also be patch-like. We thus stained for *Th*, *Htr7*, and *Tac1*. *Htr7+ / Tac1+* cells appeared  
203 in patchy distributions, but more ventromedial than most of the patches marked by *Kremen1* or *Sema5b*  
204 (Fig 3J, Fig 4B, C). *Htr7+ / Tac1+* cells were 14x more likely to be *Th+* than *Htr7- / Tac1+* cells, matching  
205 the scRNA-Seq data (Fig 4A,D). Our scRNAseq analysis predicted that *Th* would mark only the most  
206 distinct tip of the D2H continuum (Fig 4A). Indeed, triple-positive cells were limited to the most  
207 ventromedial part of the D2H-patches, particularly the medial shell (Fig 4B). We therefore define a novel  
208 spatial compartment of the striatum composed of ventromedial patch-regions containing *Tac1+ / Htr7+* D2  
209 SPNs, and a sub-region expressing *Th* that is restricted to patches in the medial shell. This subtype of  
210 SPNs has been observed in our and other single-cell databases, but its anatomy and relationship to the  
211 striatal patch compartment has not been described<sup>10</sup>. Intriguingly, the *Th+* cells did not express *Ddc*,  
212 suggesting that they do not metabolize dopamine but instead use tyrosine hydroxylase in a different  
213 pathway.

214

215 *Splicing and identity determination of a D1R/D2R co-expressing type*

216 Though D1 and D2 receptors are primarily non-overlapping in expression and function, there is known to  
217 be co-expression and even heterodimerization of these two receptors (Frederick et al., 2015). We found  
218 that most D2 SPNs expressed the D1 receptor at scattered, low levels and the D1 SPNs expressed almost  
219 no D2R (Fig 1C). The subtype with highest co-expression of *Drd1a* and *Drd2* was the D1H-*Nxph4*  
220 subtype (Fig 1C). *Drd1a / Drd2* co-expression in this subtype was not observed in recent droplet  
221 microfluidics atlases, possibly due to the low detection rate of those technologies<sup>10,22</sup>. The D2 receptor is  
222 expressed in two isoforms, short (D2S) and long (D2L)<sup>23</sup> (Fig 5B). We found that just 8% of isoform-  
223 specific reads mapped to D2S in D2 SPNs, consistent with previous literature (Fig 5C)<sup>23</sup>. Expression was  
224 similar in the novel ventromedial-patch subtype D2-*Htr7*, which co-expresses *Tac1* and *Penk*, but not  
225 *Drd1a* and *Drd2* (Fig 1B, Fig 5C). Intriguingly, we found that 34% of isoform-specific reads mapped to  
226 D2S in the D1H-*Nxph4* subtype (Fig 5C). Therefore we find that the D2S isoform is specific to D1R/D2R  
227 co-expression.

228

229 To understand the molecular pathways driving this phenomenon, we investigated transcription factors  
230 (TFs) and splicing factors (SFs) enriched in the D1H-*Nxph4* subtype. We found 3 SFs enriched in D1H-  
231 *Nxph4* (FDR < 0.1), one of which may be responsible for splicing out exon 6 (Fig 5C). We found 19 TFs  
232 enriched (FDR < 0.1) (Fig 5D). To determine which TFs might control *Drd2* expression in D1H-*Nxph4*,  
233 we also measured the correlation of each TF to *Drd2* across all SPNs. *Isl1* was the most highly  
234 anticorrelated to *Drd2* throughout all SPNs and de-enriched in the D1H-*Nxph4* subtype. *Sp9* was the most  
235 highly correlated to *Drd2* and enriched in the D1H-*Nxph4* cell type. This suggests that *Isl1* is an inhibitor  
236 and *Sp9* is an activator of *Drd2* expression in D1H-*Nxph4* cells. *Sp9* and *Isl1* are required for proper  
237 formation of D2 and D1 neurons<sup>24-26</sup>. However, since *Isl1* is not expressed in D1H-*Nxph4* cells, it cannot  
238 be solely responsible for turning on *Drd1a* expression. Therefore we measured the correlation of each  
239 enriched TF to *Drd1a*, and found that *Foxp2* was by far the most positively-correlated to *Drd1a* among  
240 TFs enriched in D1H-*Nxph4* cells. Together, our results suggest *Isl1* as a *Drd2* repressor, *Sp9* as a *Drd2*  
241 activator, and *Foxp2* as a *Drd1a* activator.

## 242 Discussion

243 Striatal projection neurons have previously been classified into D1 and D2 SPNs with regional differences  
244 defined by anatomical region. Recently, two additional types of SPNs have been found and partially  
245 characterized *in situ*<sup>10,12</sup>. We demonstrate that these identities are composed of four discrete types, D1,  
246 D1H, D2, and ICj neurons. Within the striatum, D1, D2, and D1H SPNs are composed of continuous  
247 subtypes that correspond to anatomical gradients and compartments.

248  
249 The effort to describe neuron types is still lacking an ontology that can describe the full range of neuronal  
250 heterogeneity while providing structure and clarity. In particular, it remains difficult to relate high-  
251 dimensional molecular heterogeneity to well-mapped anatomical regions. Early efforts to use single-cell  
252 sequencing classified neurons into many discrete types, and mapped the specific regions in which those  
253 clusters were present<sup>22,27</sup>. However, it was observed that many neurons had characteristics of at least two  
254 classes<sup>11</sup>. It was also observed that similar or overlapping neuron classes were often anatomically  
255 adjacent<sup>11,22,28</sup>. Additionally, it has been found that neurons from adjacent regions are often  
256 transcriptionally similar<sup>23</sup>. *In situ* staining showed that gene expression could vary in a gradient-like  
257 manner across an anatomical region<sup>17</sup>. In simple systems, this meant that dissociated cells could be  
258 mapped at high resolution to their position along a spatial axis just by their transcriptome<sup>2,7,16,29</sup>.  
259 However, these results have not been combined into a broad framework that can be applied to more  
260 complex systems.

261  
262 Our work addresses this challenge by providing a clear framework for relating neuronal identity and  
263 anatomy, and for revealing in greater detail than ever before how discrete and continuous heterogeneity  
264 relates to anatomy. In the striatum, we showed that discrete types have no implied spatial relationships to  
265 one another, and can coexist randomly intermingled throughout a region as in the case of D1 or D2  
266 neurons, or can exist in discrete regions composed of single subtypes, as in the Islands of Calleja. Stable  
267 continuous heterogeneity almost always encodes spatial gradients. Subtypes that are directly continuous  
268 are generally anatomically adjacent. Previous papers have reported similar subtypes that are anatomically  
269 adjacent, but that appear discrete due to a small number of co-expressing neurons<sup>30</sup>. We instead propose  
270 that spatial gradients can occur over very small length scales, exemplified by the OT-ruffle transition,  
271 which occurs over just 150  $\mu\text{m}$ . Additionally, continuous heterogeneity does not always imply an obvious  
272 linear gradient of expression, as demonstrated by the patch-matrix axis. Our conclusion is that stable,  
273 continuous neuronal subtypes are related by an underlying anatomical axis, regardless of the details of the  
274 continuity; discrete subtypes are not.

275  
276 Our work provides a natural explanation and solution to a key challenge of how to define neuronal  
277 subtypes. We show that each neuron is defined by multiple independent axes of heterogeneity, which  
278 demonstrates that neurons are best defined by a combinatorial identity. The effort of assigning neurons to  
279 types has been hindered by the difficulty of finding unique marker genes for each subtype<sup>28,31</sup>. Previous  
280 papers have dealt with this by naming neuron types by the combination of genes that best define them<sup>10</sup>,  
281 although this can lack clarity and interpretability. We showed that both the genes encoding dorsoventral  
282 gradients and the genes encoding the patch-matrix gradients are shared between the D1 and D2 discrete  
283 subtypes. Because of this, there are not great marker genes defining, for example, just the cells of the  
284 dorsal D1 patches. Instead, these cells are best defined by three genes: a D1 gene (*Drd1a*), a dorsal gene  
285 (*Cnr1*), and a patch gene (*Kremen1*). Therefore we conclude that most projection neurons in the striatum  
286 in fact are best defined by three values: one discrete value indicating D1 or D2 identity, one continuous  
287 value indicating dorsoventral identity, and one continuous value indicating patch-matrix identity. Our  
288 work therefore describes both an interpretable ontology, and a fundamental biological reason for using it.

289  
290 The dorsolateral-ventromedial gradients of expression align with the topology of striatal connectivity,  
291 which also changes in a graded manner along the dorsolateral-ventromedial axis<sup>32,33</sup>. In fact, most of the

292 anatomical compartments we describe have distinct patterns of connectivity, and connectivity changes in  
293 a graded manner along the dorsolateral-ventromedial axis<sup>32,33</sup>. This suggests that circuits are themselves  
294 not discrete units composed of large numbers of cells. Instead, circuits may be defined highly locally, by  
295 the combinatorial and gradient identities of their underlying neurons.

296  
297 Our *in situ* characterization of the newly-discovered D1H subtype reveals that it has a complex  
298 anatomical distribution. Surprisingly, we find that it is present in homogenous clusters of cells in the  
299 NAcc, and comprises the entirety of the lateral stripe of the striatum. As observed previously, it is also  
300 scattered throughout the CPu<sup>10</sup>. The scattered dorsal D1H subtypes expresses the unique marker *Nxph4* as  
301 well as the conserved dorsal marker *Cnr1*, whereas the D1H subtype in the ventral clusters expresses the  
302 unique marker *Tac2* and the conserved ventral marker *Crym*. The ventral clusters and LSS largely  
303 correspond to the TAC2+ clusters found by immunohistochemistry<sup>34</sup>. The D1H cells also have a third  
304 subtype expressing the conserved medial shell marker *Stard5*; we therefore predict that this represents  
305 D1H cells present in the medial shell region.

306  
307 Interestingly, we show that the D1H subtype co-expresses the D1 and D2 dopamine receptors. We also  
308 show that this co-expressing type is the only one with high levels of the D2S isoform of the D2 receptor.  
309 Previous studies have shown that the D2S isoform only acts presynaptically<sup>23,35</sup>. Separate studies have  
310 proposed the existence of a D1/D2 heterodimer and suggested that it is only localized somatically and  
311 presynaptically<sup>36</sup>. Since D1/D2 co-expression and D2S isoform expression are correlated, both  
312 transcriptionally and physiologically, the D1/D2 heterodimer may require the D2S isoform to form. The  
313 difficulty of assessing D1/D2 co-expression or heterodimerization could thus be due to the alternate D2  
314 isoforms having lower binding to common D2 antibodies.

315  
316 We utilized the complex expression of *Drd1a* and *Drd2* in our dataset to discover their transcriptional  
317 regulators. *Isl1* and *Sp9* were highly correlated to D1/D2 identity, as previously reported<sup>12</sup>, and *Isl1* is  
318 known to be required for SPN development. However, both of them explained *Drd2* expression much  
319 better than *Drd1a* expression, suggesting that they are more likely regulators of *Drd2*. *Drd1a* expression  
320 was much better explained by *Foxp2*. *Foxp2* has been shown to control *Drd1* expression in the songbird  
321 striatopallidal system, and the gene is among the most highly conserved among mammals<sup>37,38</sup>.  
322 Interestingly, it is the only gene clearly linked to acquisition of language in humans<sup>39</sup>. Our studies provide  
323 motivation for studying the role of *Foxp2* in the learning and the dopamine receptive system.

324  
325 Combining *in situ* and single-cell data, we discovered a novel anatomical compartment of the striatum.  
326 The D2 subtype expressing *Htr7* and co-expressing *Tac1* and *Penk* was recently described in single-cell  
327 data<sup>10,12</sup>. Interestingly, we find that this subtype is continuous with the D2-patch cells in the scRNA-seq  
328 data. We then showed that it was present in patchy regions in the ventromedial CPu and medial shell. We  
329 thus conclude that this subtype is a ventromedial extension of the patch-matrix complex, and define the  
330 *Drd2+* ventromedial patch as a novel region of the striatum. The patch region of the striatum was  
331 previously only observed in the CPu and NAcc and not in the medial shell<sup>40</sup>. Our results suggest that this  
332 is because the D2-*Htr7* subtype has a different gene expression signature than the D1- and D2-patch types.

333  
334 Overall, our work advances our understanding of the basis of neuronal heterogeneity and provides many  
335 targets for investigating the role of the striatum in health and disease. Our work has broad implications for  
336 studies of neural circuits and neural computations. Clearly the impressive local heterogeneity of neurons  
337 of a given classical type such as D1 SPNs means that even manipulations of small numbers of neurons of  
338 a class will in fact affect sets of different neurons, and will have different significance based on where  
339 exactly that manipulation is applied. Traditionally circuits are explored by probing hundreds, often  
340 thousands of neurons that are thought to be the same type, and correlating their activity with a  
341 downstream readout. However, if neurons have a defined identity that goes beyond their type and is

342 determined by location and gene expression patterns, it is difficult to envision defined circuits between  
343 large numbers of cells. There must be a substructure to these circuits that depends on the precise identity  
344 of the neurons involved, and this substructure may be as important for neural computations as the overall  
345 connectivity of the neurons themselves. It is possible that a redefinition of the concept of neural circuits  
346 may lead to a better understanding of how the brain processes information by analyzing the brain's  
347 computational networks not as bulk circuits, but deconvolving synaptic connections into more precise  
348 point-to-point circuits that differ among neurons of the same type depending on their location and gene  
349 expression patterns.

350  
351  
352  
353  
354  
355  
356  
357  
358  
359  
360  
361  
362  
363  
364  
365  
366  
367  
368  
369  
370  
371  
372  
373  
374  
375  
376  
377  
378  
379  
380  
381  
382  
383  
384  
385  
386  
387  
388

## Figure Legends



389

390 **Figure 1. Computational analysis and mapping of SPN heterogeneity.**

- 391 A. SPNs clustered and discreteness analyzed with PAGA i) using regular PCA or ii) after truncating  
392 the PC loadings so that only 200 genes had non-zero loadings per PC.
- 393 B. Gene expression defining 3 discrete subtypes: D1 (Drd1a and Tac1), D2 (Drd2 and Penk), and  
394 D1H (Nxph4 and Pcdh8).
- 395 C. Subclustering D1 MSNs and markers defining each subcluster. Number of unique genes  
396 calculated as the number of genes enriched (FDR < 0.05) in only that subtype and no others.  
397 Several subtypes are clearly more “intermediate” and lack many clear unique markers.
- 398 D. Mapping D1 and D2 subclusters to anatomical location using the Allen Brain Atlas *in situ*  
399 database.
- 400 E. A map of the striatum with colors corresponding to the D1 subclusters (corresponding D2 map in  
401 Sup Fig X).
- 402 F. Anatomical subclusters of D1 and D2 SPNs. Most subclusters are conserved, but several are  
403 unique to either D1 or D2.
- 404 G. A novel subregion of the medial shell of the striatum marked by Serpinb2 expression (Allen  
405 Brain Atlas). scRNAseq plots are in Sup Fig X.
- 406
- 407

408 **Figure 2. In situ mapping of the discrete types of SPNs**

- 409 A. *Tac1* and *Penk* primarily separate discrete D1 and D2 SPNs.
- 410 B. Fluorescence image the D1 and D2 discrete types using RNA in situ (RNAscope) of *Tac1* (red)  
411 and *Penk* (blue) mRNA.
- 412 C. Distribution of *Tac1* vs. *Penk* expression, measured by the ratio of the integrated intensity per cell  
413 of either stain in log space. The distribution is strongly bimodal.
- 414 D. Expression of *Crtac1*, which defines the discrete ICj subtype.
- 415 E. *In situ* expression (RNAscope) of a signature corresponding to the ICj subtype. This signature is  
416 calculated as the ratio  $\frac{Cxcl14}{Synpr * Nts}$ , using integrated intensities per cell of each probe in log space.
- 417 F. Fluorescence image of *Cxcl14* (red), *Nts* (green), and *Synpr* (blue) in situ probes used to calculate  
418 the signature in 2F. Scale bar is 10µm. The change from D1-OT to ICj is step-like.
- 419 G. *In situ* quantification of *Synpr* expression, showing a discrete, step-like change from the OT  
420 region to the ICj region.
- 421 H. Expression of *Nxph4*, which defines the Nxph4+ subset of the discrete D1H subtype.
- 422 I. *In situ* expression (RNAscope) of a signature corresponding to the D1H-Nxph4 subtype. This  
423 signature is calculated as  $Nxph4 * Tac1 * Penk$ , using integrated intensities per cell of each  
424 probe in log space. Any cell that does not express all three genes is colored grey.
- 425 J. Fluorescence image of *Tac1* (red), *Nxph4* (green), and *Penk* (blue) in situ probes used to calculate  
426 the signature in 2F. Scale bar is 10µm. The D1H-Nxph4 subtype appears scattered throughout the  
427 CPU.
- 428 K. Fluorescence image of *Tac1* (red), *Nxph4* (green), and *Penk* (blue) in situ probes in the lateral  
429 NAcc and lateral stripe of the striatum (LSS). Arrow corresponds to the spatial axis showing a  
430 discrete change in expression from the NAcc to the LSS.
- 431 L. Single-cell quantification of the D1H-Nxph4 signature  $Nxph4 * Tac1 * Penk$ , in log intensity  
432 space, over the spatial axis defined by the arrow in Fig 2K.
- 433 M. Expression of *Tac2*, which defines the Tac2+ subset of the discrete D1H subtype.
- 434 N. *In situ* expression (RNAscope) of a signature corresponding to the D1H-Tac2 subtype. This  
435 signature is calculated as  $Tac2 * Tac1 * Penk$ , using integrated intensities per cell of each probe  
436 in log space. Any cell that does not express all three genes is colored grey.
- 437 O. Fluorescence image of *Tac1* (red), *Tac2* (green), and *Penk* (blue) in situ probes in the NAcc and a  
438 ventral cluster.

439 P. Single-cell quantification of the D1H-Tac2 signature  $Tac2 * Tac1 * Penk$ , in log intensity space,  
440 over the spatial axis defined by the arrow in Fig 2K.  
441  
442

443 **Figure 3. Independent spatial gene expression gradients underlie continuous subtypes of**  
444 **the striatum**

- 445 A. PAGA of D1 SPNs, performed using 60-gene truncated PCA after filtering pheno-orthogonal PCs.  
446 B. PAGA of D2 SPNs, performed using 60-gene truncated PCA after filtering pheno-orthogonal PCs.  
447 C. Expression of the marker defining the medial shell (mShell) region of the striatum.  
448 D. Reference map of striatal anatomy showing that the mShell is anatomically adjacent to the NAcc,  
449 but not to the CPu  
450 E. Expression of a conserved *Cnr1-Crym* score across 3 discrete subtypes. The signatures were  
451 calculated by summing over the top 10 genes correlated to *Cnr1* or *Crym* in all 3 subtypes. Each  
452 cell was scored the subtracting the *Crym* signature from the *Cnr1* signature.  
453 F. *In situ* quantification of *Cnr1 -Crym*, using integrated probe intensity in log space.  
454 G. Quantification of the *Cnr1 -Crym* along the dorsolateral-ventromedial axis of the CPu, defined  
455 by the white lines in Fig 3F.  
456 H. Representative *in situ* fluorescence of *Cnr1* (green) and *Crym* (red) RNAscope probes in the  
457 dorsolateral (top), intermediate (middle), and ventromedial (bottom) CPu.  
458 I. Expression of a conserved *Kremen1-Id4* score across 2 discrete subtypes. The signatures were  
459 calculated by summing over the top 10 genes correlated to *Kremen1* or *Id4* in both subtypes. Each  
460 cell was scored the subtracting the *Id4* signature from the *Kremen1* signature.  
461 J. *In situ* quantification of the patch-matrix signature defined as  $(Kremen1 + Sema5b) - Id4$ , using  
462 integrated probe fluorescence intensity in log space.  
463 K. Quantification of the patch-matrix signature within two real, adjacent patches (left panel). White  
464 lines show manually-defined boundaries of the patch, dividing the plot into 3 regions (patch.1,  
465 patch.2, and matrix). Right panel shows simulated discrete patches, where the expression of cells  
466 are scrambled within each of the 3 regions.  
467 L. Quantification of spatial information by the correlation of the patch-matrix signature of a cell to  
468 its 2<sup>nd</sup> nearest-neighbor (2-nn).  
469 M. Monte Carlo simulation of the 2-nn correlation ( $\rho$ ) of 1000 discrete patches (grey distribution)  
470 and the true  $\rho$  (red line).  
471 N. scRNAseq expression of *Nts* and *Cxcl14* signatures in D1 SPNs, calculated by the average value  
472 of the top 10 genes correlated to *Nts* and *Cxcl14*, respectively. Bottom panel represents the sum of  
473 the *Cxcl14* and *Synpr* signature subtracted from the *Nts* signature.  
474 O. *In situ* quantification of the OT-ruffle signature defined as  $Nts - (Cxcl14 + Synpr)$ , using  
475 integrated fluorescence intensity in log space.  
476 P. Quantification of individual genes (upper plot) and  $Nts - (Cxcl14 + Synpr)$  (lower plot) along the  
477 spatial axis from a medial OT-ruffle to the flat OT to a lateral OT-ruffle.  
478 Q. Representative *in situ* fluorescence of *Cxcl14* (red), *Synpr* (green), and *Nts* (blue) RNAscope  
479 probes in the flat OT (upper), intermediate (middle), and OT-ruffle (bottom).  
480  
481  
482  
483  
484  
485  
486  
487  
488

**Figure 4. Defining a novel region of the striatum populated by patch-like D2H SPNs.**

- 489 A. ScRNAseq expression of matrix, patch, and D2H markers in D2 SPNs (tSNE dimensionality  
490 reduction). The D2H subtype is seen as a continuous extension of the D2-patch system.  
491 B. *In situ* quantification of D2H markers Htr7 (left), Th (middle). Cells below the detection  
492 threshold are grey. Triple-positive cells are shown in the right plot displayed as blue and non-  
493 triple-positive cells are grey.  
494 C. Quantification of Th expression among Tac1+ cells showing a strong enrichment in the middle of  
495 the striatum, corresponding to the location of the medial shell.  
496 D. *In situ* quantification of the fraction of cells expressing Th, separated by whether they also  
497 express Htr7.  $P < 0.001$ , OR = 14.  
498  
499

500 **Figure 5. Splicing and identity determination of a D1R/D2R co-expressing type of SPN.**

- 501 A. Genomic structure of the D2 receptor. The 6<sup>th</sup> exon is known to be skipped.  
502 B. Quantification of the fraction of reads aligning to the skipped exon over the total reads aligning to  
503 either junction,  $\frac{exon5:exon7}{exon5:exon7+exon5:exon6}$ .  
504 C. Average log fold change of top differentially expressed splice factors (selected from GO: 190641),  
505 comparing D1H-Nxph4 cells to all the other SPNs. The 3 genes significantly enriched in D1H-  
506 Nxph4 are displayed as text and in red (FDR < 0.1).  
507 D. Transcription factors (TFs) that are candidates for controlling *Drd2* expression. TFs shown are all  
508 those significantly enriched in D1H-Nxph4 cells vs all other SPNs (FDR < 0.1). Genes are  
509 colored by their correlation to *Drd2* ( ) across all SPN subtypes. Gene size is calculated as  $0.5 +$   
510 *Drd2* correlation \* sign(D1H-Nxph4 log FC). Genes that are positively correlated to *Drd2* and  
511 enriched in D1H-Nxph4 are large; genes that are negatively correlated to *Drd2* and de-enriched in  
512 D1H-Nxph4 are large; others are small.  
513 E. Transcription factors (TFs) that are candidates for controlling *Drd1a* expression. TFs shown are  
514 all those significantly enriched in D1H-Nxph4 cells vs all other SPNs (FDR < 0.1). Genes are  
515 colored by their correlation to *Drd1a* across all SPN subtypes. Gene size is calculated as  $0.5 +$   
516 *Drd1a* correlation \* sign(D1H-Nxph4 log FC). Genes that are positively correlated to *Drd1a* and  
517 enriched in D1H-Nxph4 are large; genes that are negatively correlated to *Drd1a* and de-enriched  
518 in D1H-Nxph4 are large; others are small.  
519  
520  
521  
522  
523  
524  
525  
526  
527  
528  
529  
530  
531  
532  
533  
534  
535

536 **References**

537

538 1. Harris, K. D. *et al.* Classes and continua of hippocampal CA1 inhibitory neurons revealed by  
539 single-cell transcriptomics. *Plos Biol* **16**, e2006387 (2018).

540

541 2. Muñoz-Manchado, A. B. *et al.* Diversity of Interneurons in the Dorsal Striatum Revealed by  
542 Single-Cell RNA Sequencing and PatchSeq. *Cell Reports* **24**, 2179-2190.e7 (2018).

543

544 3. Zeisel, A. *et al.* Molecular architecture of the mouse nervous system. *Biorxiv* 294918 (2018).  
545 doi:10.1101/294918

546

547 4. Zeisel, A. *et al.* Cell types in the mouse cortex and hippocampus revealed by single-cell RNA-  
548 seq. *Science* **347**, 1138–1142 (2015).

549

550 5. Pandey, S., Shekhar, K., Regev, A. & Schier, A. F. Comprehensive Identification and Spatial  
551 Mapping of Habenular Neuronal Types Using Single-Cell RNA-Seq. *Curr Biol* **28**, (2018).

552

553 6. Tepe, B. *et al.* Single-Cell RNA-Seq of Mouse Olfactory Bulb Reveals Cellular Heterogeneity  
554 and Activity-Dependent Molecular Census of Adult-Born Neurons. *Cell Reports* **25**, 2689-  
555 2703.e3 (2018).

556

557 7. Kalish, B. T. *et al.* Single-cell transcriptomics of the developing lateral geniculate nucleus  
558 reveals insights into circuit assembly and refinement. *Proc National Acad Sci* **115**, E1051–E1060  
559 (2018).

560

561 8. Lake, B. B. *et al.* Neuronal subtypes and diversity revealed by single-nucleus RNA  
562 sequencing of the human brain. *Science* **352**, 1586–1590 (2016).

563

564 9. Darmanis, S. *et al.* A survey of human brain transcriptome diversity at the single cell level.  
565 *Proc National Acad Sci* **112**, 7285–7290 (2015).

566

567 10. Saunders, A. *et al.* Molecular Diversity and Specializations among the Cells of the Adult  
568 Mouse Brain. *Cell* **174**, 1015-1030.e16 (2018).

569

570 11. Tasic, B. *et al.* Adult mouse cortical cell taxonomy revealed by single cell transcriptomics.  
571 *Nat Neurosci* **19**, 335–346 (2016).

572

573 12. Gokce, O. *et al.* Cellular Taxonomy of the Mouse Striatum as Revealed by Single-Cell RNA-  
574 Seq. *Cell Reports* **16**, 1126–1137 (2016).

575

576 13. Zeng, H. & Sanes, J. R. Neuronal cell-type classification: challenges, opportunities and the  
577 path forward. *Nat Rev Neurosci* **18**, 530–546 (2017).

578

579 14. Tasic, B. Single cell transcriptomics in neuroscience: cell classification and beyond. *Curr*  
580 *Opin Neurobiol* **50**, 242–249 (2018).

581

- 582 15. Satija, R., Farrell, J. A., Gennert, D., Schier, A. F. & Regev, A. Spatial reconstruction of  
583 single-cell gene expression data. *Nat Biotechnol* **33**, 495–502 (2015).  
584
- 585 16. Halpern, K. *et al.* Single-cell spatial reconstruction reveals global division of labour in the  
586 mammalian liver. *Nature* **542**, 352 (2017).  
587
- 588 17. Cembrowski, M. S. *et al.* Spatial Gene-Expression Gradients Underlie Prominent  
589 Heterogeneity of CA1 Pyramidal Neurons. *Neuron* **89**, 351–368 (2016).  
590
- 591 18. Durruthy-Durruthy, R. *et al.* Reconstruction of the Mouse Otocyst and Early Neuroblast  
592 Lineage at Single-Cell Resolution. *Cell* **157**, 964–978 (2014).  
593
- 594 19. Wolf, A. F. *et al.* Graph abstraction reconciles clustering with trajectory inference through a  
595 topology preserving map of single cells. *Biorxiv* 208819 (2018). doi:10.1101/208819  
596
- 597 20. Su, T. *et al.* Single-cell analysis of early progenitor cells that build coronary arteries. *Nature*  
598 **559**, 356–362 (2018).  
599
- 600 21. Millhouse, O. Granule cells of the olfactory tubercle and the question of the islands of calleja.  
601 *J Comp Neurol* **265**, 1–24 (1987).  
602
- 603 22. Zeisel, A. *et al.* Molecular Architecture of the Mouse Nervous System. *Cell* **174**, 999-  
604 1014.e22 (2018).  
605
- 606 23. Usiello, A. *et al.* Distinct functions of the two isoforms of dopamine D2 receptors. *Nature*  
607 **408**, 199 (2000).  
608
- 609 24. Zhang, Q. *et al.* The Zinc Finger Transcription Factor Sp9 Is Required for the Development  
610 of Striatopallidal Projection Neurons. *Cell Reports* **16**, 1431–1444 (2016).  
611
- 612 25. Ehrman, L. A. *et al.* The LIM homeobox gene *Isl1* is required for the correct development of  
613 the striatonigral pathway in the mouse. *Proc National Acad Sci* **110**, E4026–E4035 (2013).  
614
- 615 26. Lu, K.-M., Evans, S. M., Hirano, S. & Liu, F.-C. Dual role for *Islet-1* in promoting  
616 striatonigral and repressing striatopallidal genetic programs to specify striatonigral cell identity.  
617 *Proc National Acad Sci* **111**, E168–E177 (2014).  
618
- 619 27. Shah, S., Lubeck, E., Zhou, W. & Cai, L. In Situ Transcription Profiling of Single Cells  
620 Reveals Spatial Organization of Cells in the Mouse Hippocampus. *Neuron* **92**, 342–357 (2016).  
621
- 622 28. Moffitt, J. R. *et al.* High-performance multiplexed fluorescence in situ hybridization in  
623 culture and tissue with matrix imprinting and clearing. *Proc National Acad Sci* **113**, 14456–  
624 14461 (2016).  
625
- 626 29. Vanlandewijck, M. *et al.* A molecular atlas of cell types and zonation in the brain vasculature.  
627 *Nature* **554**, 475 (2018).

- 628  
629 30. Cembrowski, M. S. *et al.* Dissociable Structural and Functional Hippocampal Outputs via  
630 Distinct Subiculum Cell Classes. *Cell* **173**, (2018).  
631  
632 31. Li, H. *et al.* Classifying *Drosophila* Olfactory Projection Neuron Subtypes by Single-Cell  
633 RNA Sequencing. *Cell* **171**, 1206-1220.e22 (2017).  
634  
635 32. Voorn, P., Vanderschuren, L., Groenewegen, H. J., Robbins, T. W. & Pennartz, C. Putting a  
636 spin on the dorsal–ventral divide of the striatum. *Trends Neurosci* **27**, 468–474 (2004).  
637  
638 33. Poulin, J.-F. *et al.* Mapping projections of molecularly defined dopamine neuron subtypes  
639 using intersectional genetic approaches. *Nat Neurosci* **21**, 1260–1271 (2018).  
640  
641 34. Zhou, L., Furuta, T. & Kaneko, T. Neurokinin B-producing projection neurons in the lateral  
642 stripe of the striatum and cell clusters of the accumbens nucleus in the rat. *J Comp Neurol* **480**,  
643 143–161 (2004).  
644  
645 35. Mei, C., Ramos, M., Iitaka, C. & Borrelli, E. Getting specialized: presynaptic and  
646 postsynaptic dopamine D2 receptors. *Curr Opin Pharmacol* **9**, 53–58 (2009).  
647  
648 36. Perreault, M. L., Hasbi, A., O’Dowd, B. F. & George, S. R. The Dopamine D1–D2 Receptor  
649 Heteromer in Striatal Medium Spiny Neurons: Evidence for a Third Distinct Neuronal Pathway  
650 in Basal Ganglia. *Front Neuroanat* **5**, 31 (2011).  
651  
652 37. Murugan, M., Harward, S., Scharff, C. & Mooney, R. Diminished FoxP2 Levels Affect  
653 Dopaminergic Modulation of Corticostriatal Signaling Important to Song Variability. *Neuron* **80**,  
654 1464–1476 (2013).  
655  
656 38. Enard, W. *et al.* Molecular evolution of FOXP2, a gene involved in speech and language.  
657 *Nature* **418**, 869 (2002).  
658  
659 39. Fisher, S. E. & Scharff, C. FOXP2 as a molecular window into speech and language. *Trends*  
660 *Genet* **25**, 166–177 (2009).  
661  
662 40. Crittenden, J. R. & Graybiel, A. M. Basal Ganglia Disorders Associated with Imbalances in  
663 the Striatal Striosome and Matrix Compartments. *Front Neuroanat* **5**, 59 (2011).  
664

Figure 1

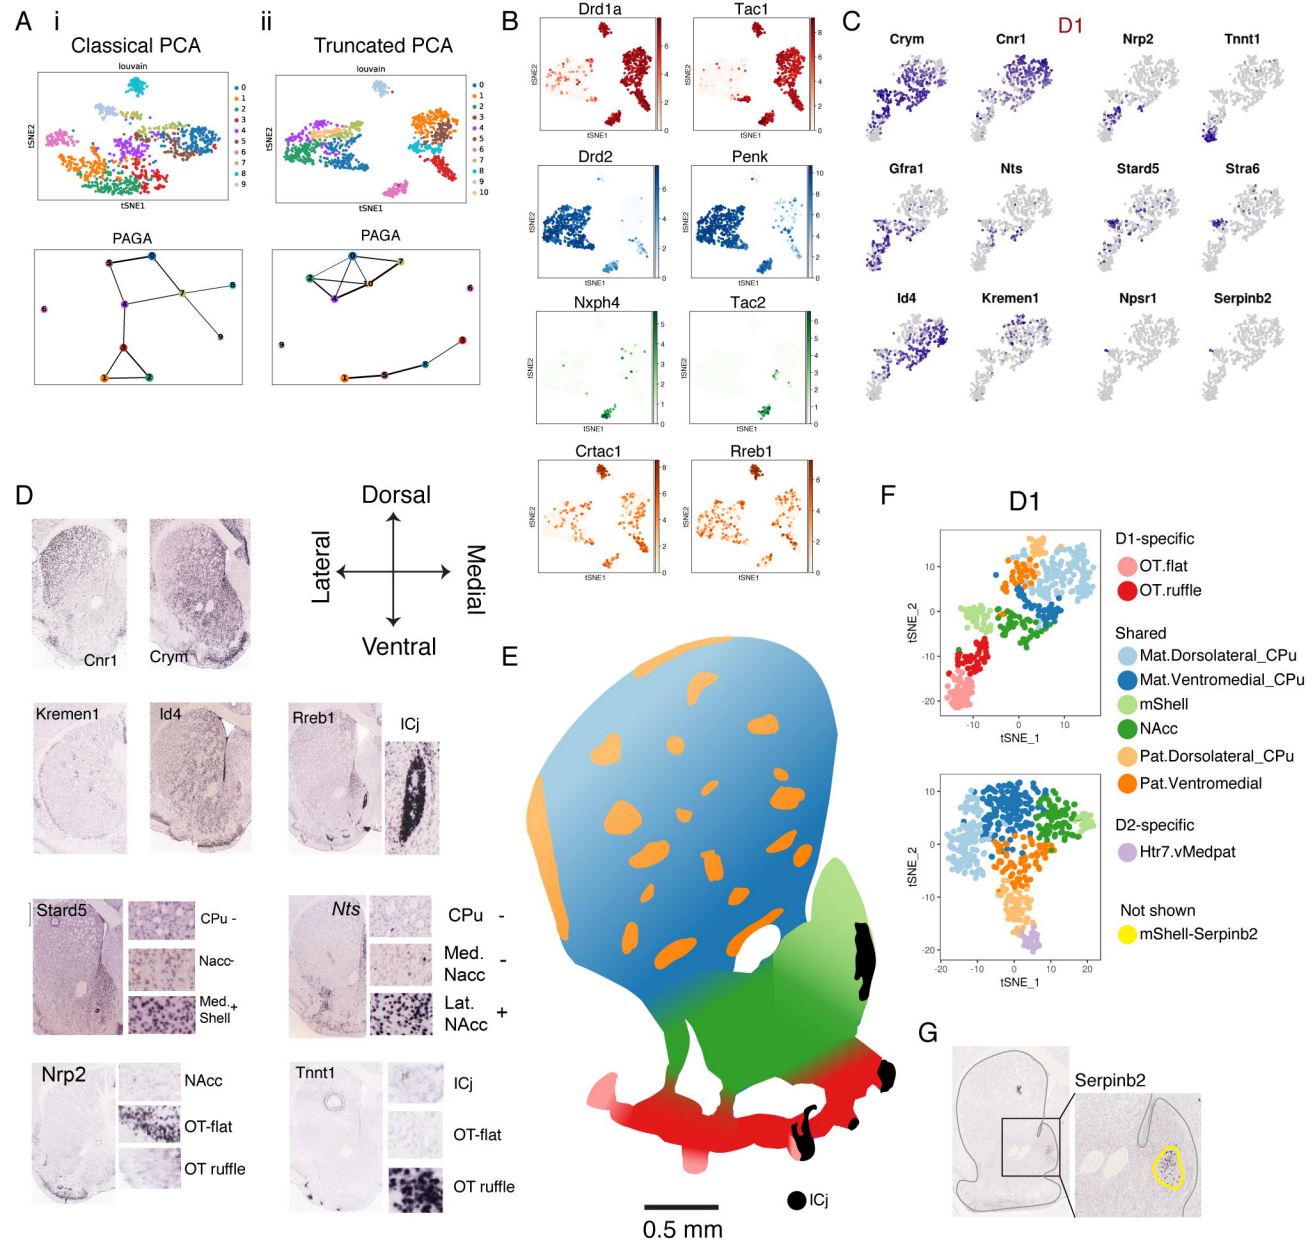

Figure 2

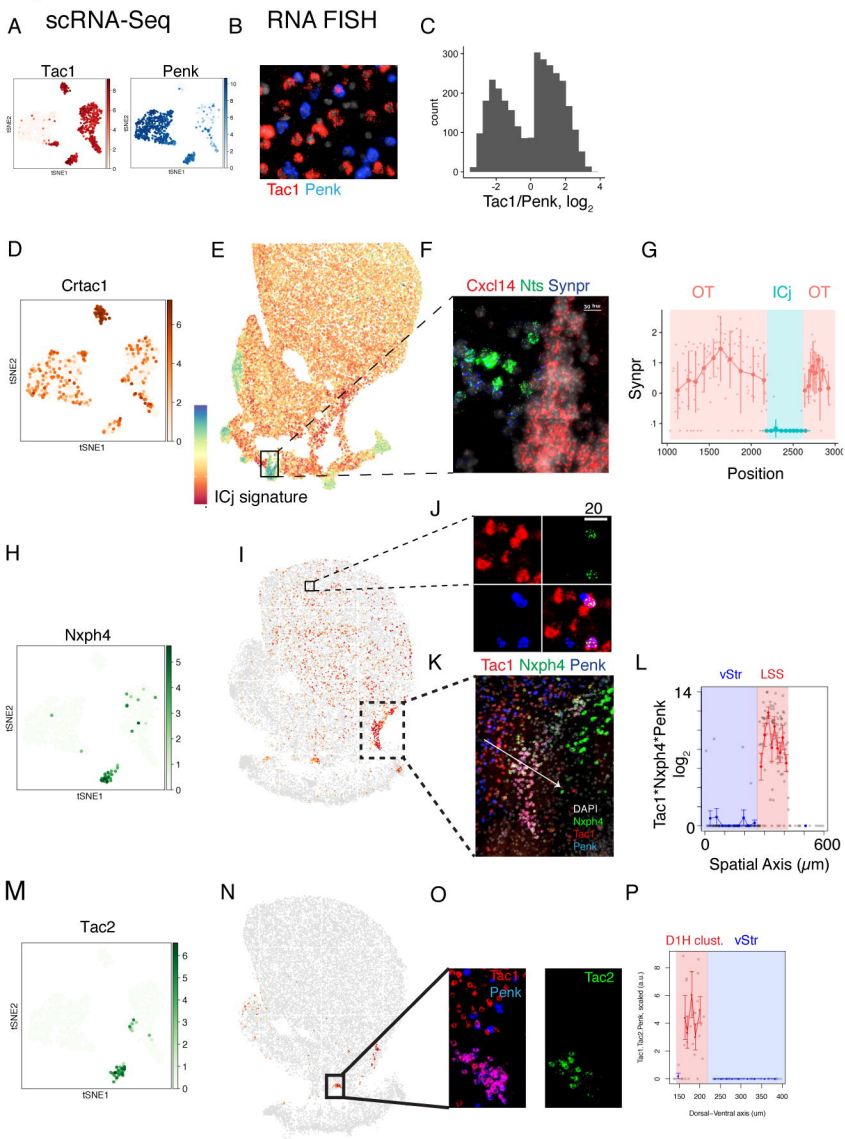



**Figure 3**

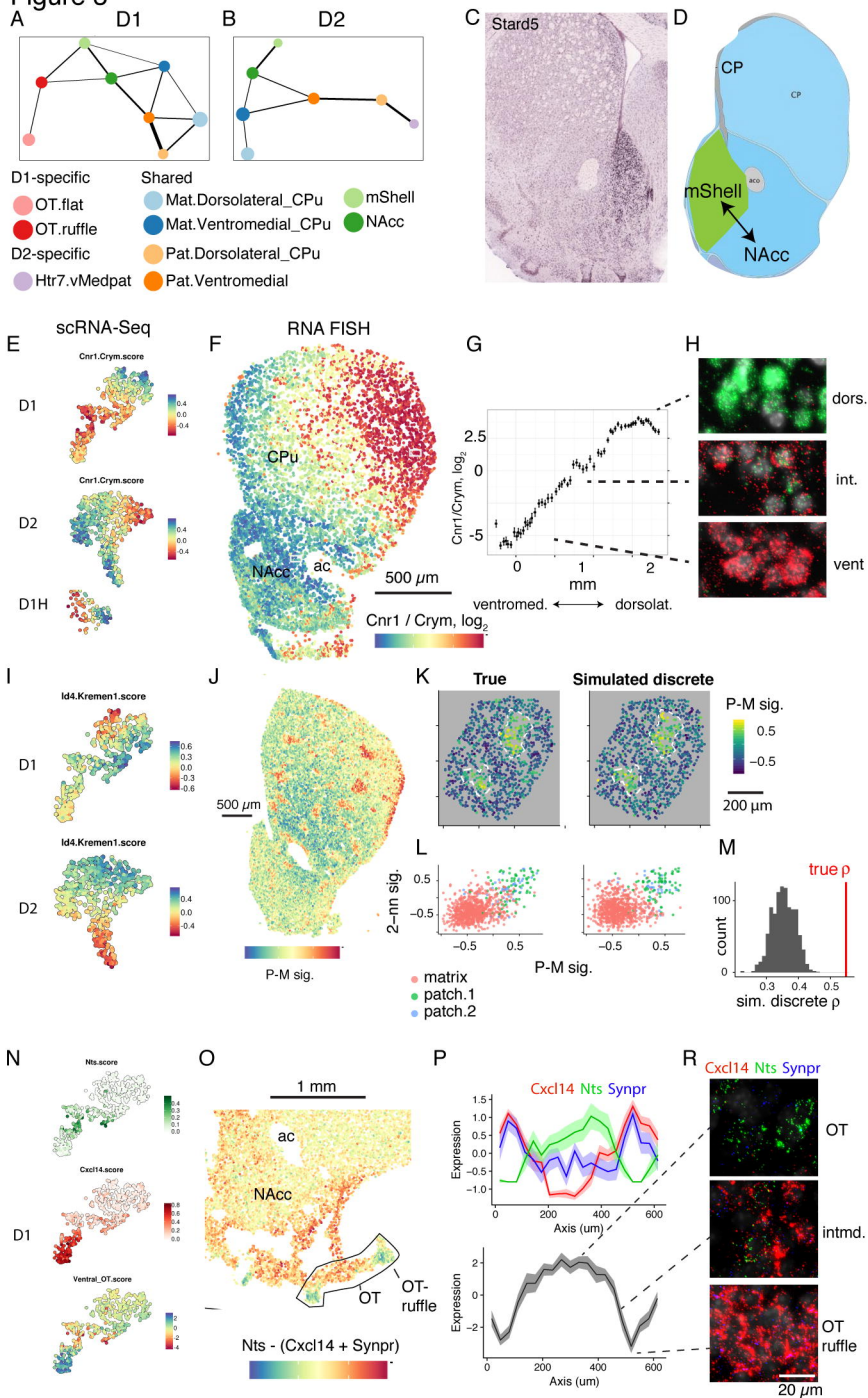

# Figure 4

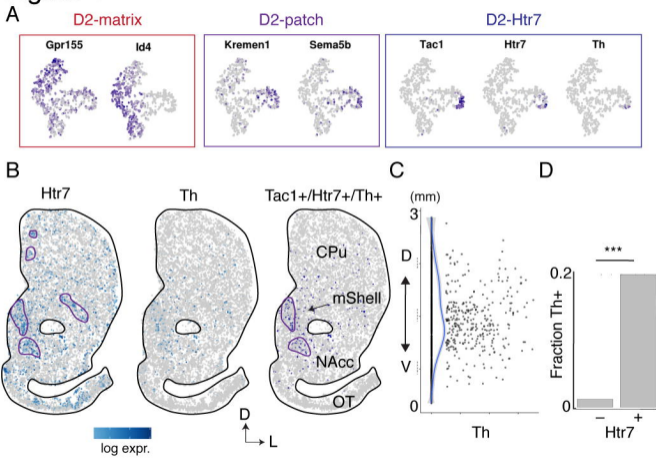

# Figure 5

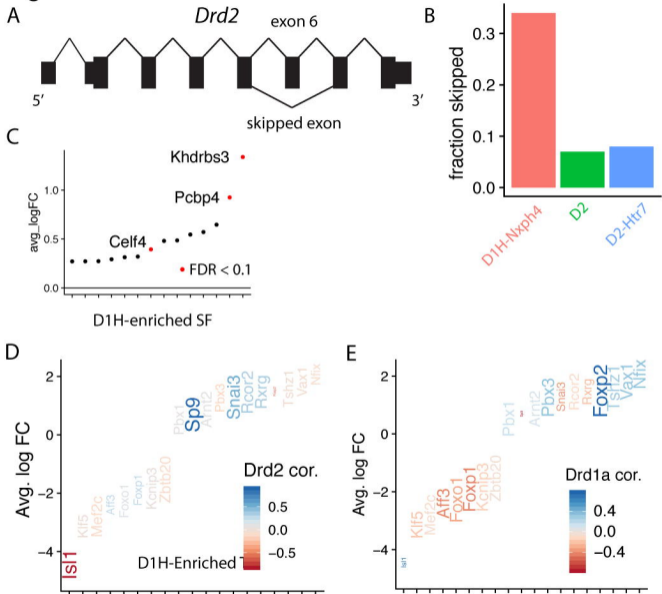

Source: http://biorxiv.org/content/10.1101/591396v1.full.pdf
